# Supplementary material for: Temporal Changes in Biochemical Responses to Salt Stress in Three Salicornia Species
Source: MDPI journal article supplement (doi:10.3390/plants13070979), 2024-03-29
Supplement: s1 [file s1]

**Supplementary Table S1.** Eigenvectors and eigenvalues of the first two components of principal components analysis for the variables measured in three *Salicornia* species (*S. persica*, *S. europea*, and *S. bigelovii*) under non-saline, moderate (300 mM NaCl), and high (500 mM NaCl) salinity conditions during three sampling times (1, 3, and 8 days after applying salinity). Abbreviations: fresh weight (FW); water content (WC), chlorophyll a (Chla), chlorophyll b (Chlb), carotenoids (Car); hydrogen peroxide (H<sub>2</sub>O<sub>2</sub>); malondialdehyde (MDA); glycine betaine (GB); proline (PRO); peroxidase (POD); catalase (CAT); superoxide dismutase (SOD); ascorbate peroxidase (APX); sodium (Na<sup>+</sup>); potassium (K<sup>+</sup>); calcium (Ca<sup>2+</sup>), and magnesium (Mg<sup>2+</sup>).

| Variable                      | Principal component |        |
|-------------------------------|---------------------|--------|
|                               | 1                   | 2      |
| POD                           | 0.973               | -0.038 |
| CAT                           | -0.935              | -0.124 |
| SOD                           | 0.922               | -0.223 |
| APX                           | 0.936               | 0.180  |
| H <sub>2</sub> O <sub>2</sub> | 0.605               | 0.355  |
| GB                            | 0.878               | 0.413  |
| PRO                           | 0.819               | 0.360  |
| MDA                           | 0.915               | 0.172  |
| K <sup>+</sup>                | -0.911              | 0.101  |
| Na <sup>+</sup>               | 0.974               | 0.031  |
| Ca <sup>2+</sup>              | 0.701               | -0.170 |
| Mg <sup>2+</sup>              | -0.946              | -0.235 |
| FW                            | -0.011              | 0.928  |
| WC                            | -0.105              | 0.931  |
| Chla                          | -0.925              | 0.322  |
| Chlb                          | -0.804              | 0.546  |
| Car                           | -0.871              | 0.310  |
| Eigenvalue                    | 12.611              | 3.748  |
| Proportion (%)                | 54.832              | 16.297 |
| Cumulative (%)                | 54.832              | 71.130 |
